# Supplementary material
Source: bioRxiv or medRxiv preprint supplement (http://www.medrxiv.org/highwire/filestream/72538/field_highwire_adjunct_files/6/2020.02.23.20027029-4.pdf)
Supplement: Supplementary file [file 2020.02.23.20027029-4.pdf]

Table S2 drug classes

| StudyArm     | PatientID | Drug                  | DrugClasses            |
|--------------|-----------|-----------------------|------------------------|
| fasting+DASH | 1         | Ramipril              | ACE_INHIBITOR          |
| fasting+DASH | 1         | ASS                   | ANTI_PLATELET          |
| fasting+DASH | 1         | Metoprolol            | BETA_BLOCKER           |
| fasting+DASH | 1         | Metformin             | METFORMIN              |
| fasting+DASH | 1         | Pantoprazol           | PPI                    |
| fasting+DASH | 1         | Simvastatin           | STATIN                 |
| fasting+DASH | 1         | L-Thyroxin            | THYROID                |
| fasting+DASH | 2         | Ramipril              | ACE_INHIBITOR          |
| fasting+DASH | 2         | Beclometasonpropionat | CORTICOSTEROID         |
| fasting+DASH | 2         | Hydrochlorothiazid    | DIURETIC               |
| fasting+DASH | 2         | Simvastatin           | STATIN                 |
| fasting+DASH | 3         | Ramipril              | ACE_INHIBITOR          |
| fasting+DASH | 3         | Amlodipin             | CALCIUMANTAGONIST      |
| fasting+DASH | 3         | Hydrochlorothiazid    | DIURETIC               |
| fasting+DASH | 3         | Moxonidin             | IMIDAZOLE_AGNIST       |
| fasting+DASH | 3         | Simvastatin           | STATIN                 |
| DASH         | 4         | Valsartan             | AT2_BLOCKER            |
| DASH         | 4         | Bisoprolol            | BETA_BLOCKER           |
| DASH         | 4         | Amlodipin             | CALCIUMANTAGONIST      |
| DASH         | 4         | Hydrochlorothiazid    | DIURETIC               |
| DASH         | 5         | Metoprolol            | BETA_BLOCKER           |
| DASH         | 5         | Spirolacton           | DIURETIC               |
| DASH         | 7         | Candesartan           | AT2_BLOCKER            |
| DASH         | 7         | Timolol               | EYE_BETA_BLOCKER       |
| DASH         | 7         | Amilorid              | DIURETIC               |
| DASH         | 7         | Hydrochlorothiazid    | DIURETIC               |
| DASH         | 8         | Ramipril              | ACE_INHIBITOR          |
| DASH         | 8         | Amlodipin             | CALCIUMANTAGONIST      |
| DASH         | 8         | Hydrochlorothiazid    | DIURETIC               |
| DASH         | 8         | Metformin             | METFORMIN              |
| DASH         | 9         | Telmisartan           | AT2_BLOCKER            |
| DASH         | 9         | Amlodipin             | CALCIUMANTAGONIST      |
| DASH         | 9         | Prednisolon           | CORTICOSTEROID         |
| DASH         | 9         | Hydrochlorothiazid    | DIURETIC               |
| DASH         | 9         | Moxonidin             | IMIDAZOLE_AGNIST       |
| DASH         | 9         | Metformin             | METFORMIN              |
| DASH         | 9         | Pantoprazol           | PPI                    |
| DASH         | 9         | Testogel              | TESTOSTERONE           |
| DASH         | 9         | L-Thyroxin            | THYROID                |
| DASH         | 9         | Vit B12               | VITAMIN_B12            |
| DASH         | 9         | Vit D3                | VITAMIN_D              |
| DASH         | 11        | Tamsulosin            | ALPHA_I_BLOCKER_BPH    |
| DASH         | 11        | ASS                   | ANTI_PLATELET          |
| DASH         | 11        | Vildagliptin          | ANTIDIABETIC           |
| DASH         | 11        | Metformin             | METFORMIN              |
| DASH         | 11        | Atorvastatin          | STATIN                 |
| DASH         | 11        | Finasterid            | TESTOSTERONE_INHIBITOR |
| DASH         | 11        | L-Thyroxin            | THYROID                |
| fasting+DASH | 12        | Lisinopril            | ACE_INHIBITOR          |

Table S2 drug classes

| StudyArm     | PatientID | Drug               | DrugClasses               |
|--------------|-----------|--------------------|---------------------------|
| fasting+DASH | 12        | Tamsulosin         | ALPHA_I_BLOCKER_BPH       |
| fasting+DASH | 12        | Xusal              | ANTIHISTAMINE             |
| fasting+DASH | 12        | Salbutamol         | BETA_2_AGNONIST           |
| fasting+DASH | 13        | NONE               | NONE                      |
| DASH         | 14        | Omega 3 Fettsäuren | OMEGA_3                   |
| DASH         | 14        | NO_aHT             | NO_aHT                    |
| DASH         | 15        | Ramipril           | ACE_INHIBITOR             |
| fasting+DASH | 16        | Ramipril           | ACE_INHIBITOR             |
| fasting+DASH | 16        | Amlodipin          | CALCIUMANTAGONIST         |
| fasting+DASH | 17        | Citalopram         | ANTIDEPRESSANT            |
| fasting+DASH | 17        | Valsartan          | AT2_BLOCKER               |
| fasting+DASH | 17        | Metoprolol         | BETA_BLOCKER              |
| fasting+DASH | 17        | Ibrandronic acid   | BISPHOSPHONATE            |
| fasting+DASH | 17        | Hydrochlorothiazid | DIURETIC                  |
| fasting+DASH | 17        | Torasemid          | DIURETIC                  |
| fasting+DASH | 17        | Tilidin            | OPIATE                    |
| fasting+DASH | 17        | Ezetimib           | CHOL_ABS_INHIBITOR        |
| fasting+DASH | 17        | Simvastatin        | STATIN                    |
| fasting+DASH | 17        | Vit D3             | VITAMIN_D                 |
| fasting+DASH | 17        | Allopurinol        | XANTHAN_OXIDASE_INHIBITOR |
| DASH         | 18        | NONE               | NONE                      |
| DASH         | 19        | Ramipril           | ACE_INHIBITOR             |
| DASH         | 19        | Amlodipin          | CALCIUMANTAGONIST         |
| DASH         | 19        | Metformin          | METFORMIN                 |
| DASH         | 20        | Candesartan        | AT2_BLOCKER               |
| DASH         | 20        | Prednisolon        | CORTICOSTEROID            |
| DASH         | 20        | Pantoprazol        | PPI                       |
| DASH         | 20        | L-Thyroxin         | THYROID                   |
| fasting+DASH | 21        | Nebivolol          | BETA_BLOCKER              |
| fasting+DASH | 21        | Amlodipin          | CALCIUMANTAGONIST         |
| fasting+DASH | 22        | Ramipril           | ACE_INHIBITOR             |
| fasting+DASH | 22        | Tamsulosin         | ALPHA_I_BLOCKER_BPH       |
| fasting+DASH | 22        | Tiotropium         | ANTICHOLINERGIC           |
| fasting+DASH | 22        | Nebivolol          | BETA_BLOCKER              |
| fasting+DASH | 22        | Lercanidipin       | CALCIUMANTAGONIST         |
| fasting+DASH | 22        | Hydrochlorothiazid | DIURETIC                  |
| fasting+DASH | 22        | Metformin          | METFORMIN                 |
| fasting+DASH | 22        | Atorvastatin       | STATIN                    |
| DASH         | 23        | Olmesartan         | AT2_BLOCKER               |
| DASH         | 23        | Amlodipin          | CALCIUMANTAGONIST         |
| DASH         | 23        | Hydrochlorothiazid | DIURETIC                  |
| fasting+DASH | 24        | Fluoxetin          | ANTIDEPRESSANT            |
| fasting+DASH | 24        | Valsartan          | AT2_BLOCKER               |
| fasting+DASH | 24        | Metoprolol         | BETA_BLOCKER              |
| DASH         | 25        | Doxazosin          | ALPHA_I_BLOCKER           |
| DASH         | 25        | Liraglutid         | ANTIDIABETIC              |
| DASH         | 25        | Simvastatin        | STATIN                    |
| DASH         | 25        | Allopurinol        | XANTHAN_OXIDASE_INHIBITOR |
| fasting+DASH | 26        | Hydrochlorothiazid | DIURETIC                  |

Table S2 drug classes

| StudyArm     | PatientID | Drug               | DrugClasses               |
|--------------|-----------|--------------------|---------------------------|
| fasting+DASH | 26        | Triamteren         | DIURETIC                  |
| DASH         | 27        | Nebivolol          | BETA_BLOCKER              |
| fasting+DASH | 28        | Lercanidipin       | CALCIUMANTAGONIST         |
| fasting+DASH | 28        | Decristol Vit D3   | VITAMIN_D                 |
| DASH         | 29        | Candesartan        | AT2_BLOCKER               |
| DASH         | 29        | Amlodipin          | CALCIUMANTAGONIST         |
| fasting+DASH | 30        | Estradiol          | ESTROGEN                  |
| fasting+DASH | 30        | Symbioflor         | PROBIOTIKUM               |
| fasting+DASH | 30        | Levonorgestrel     | PROGESTERON               |
| fasting+DASH | 30        | NO_aHT             | NO_aHT                    |
| DASH         | 31        | Lisinopril         | ACE_INHIBITOR             |
| DASH         | 31        | ASS                | ANTI_PLATELET             |
| DASH         | 31        | Glimepirid         | ANTIDIABETIC              |
| DASH         | 31        | Bisoprolol         | BETA_BLOCKER              |
| DASH         | 31        | Lercanidipin       | CALCIUMANTAGONIST         |
| DASH         | 31        | Hydrochlorothiazid | DIURETIC                  |
| DASH         | 31        | Metformin          | METFORMIN                 |
| DASH         | 31        | Simvastatin        | STATIN                    |
| DASH         | 32        | Metformin          | METFORMIN                 |
| DASH         | 32        | Pantoprazol        | PPI                       |
| DASH         | 32        | NO_aHT             | NO_aHT                    |
| fasting+DASH | 33        | Valsartan          | AT2_BLOCKER               |
| fasting+DASH | 33        | Metformin          | METFORMIN                 |
| fasting+DASH | 33        | Jecoris oleum      | OMEGA_3                   |
| fasting+DASH | 33        | Pravastatin        | STATIN                    |
| fasting+DASH | 33        | Jecoris oleum      | VITAMIN_A                 |
| fasting+DASH | 33        | Jecoris oleum      | VITAMIN_D                 |
| fasting+DASH | 33        | Allopurinol        | XANTHAN_OXIDASE_INHIBITOR |
| fasting+DASH | 34        | Losartan           | AT2_BLOCKER               |
| fasting+DASH | 34        | Salmeterol spary   | BETA_2_AGNONIST           |
| fasting+DASH | 34        | Flutide Spray      | CORTICOSTEROID            |
| fasting+DASH | 34        | Hydrochlorothiazid | DIURETIC                  |
| fasting+DASH | 34        | Loratadin          | HISTAMINE_INHIBITOR       |
| fasting+DASH | 34        | Theophyllin retard | THEOPHYLLIN               |
| fasting+DASH | 35        | Duloxetine         | ANTIDEPRESSANT            |
| fasting+DASH | 35        | Aliskiren          | RENIN_INHIBITOR           |
| fasting+DASH | 35        | Metoprolol         | BETA_BLOCKER              |
| fasting+DASH | 35        | Clonidin           | IMIDAZOLE_AGNONIST        |
| fasting+DASH | 35        | Metformin          | METFORMIN                 |
| fasting+DASH | 35        | Pantoprazol        | PPI                       |
| fasting+DASH | 35        | L-Thyroxin         | THYROID                   |
| fasting+DASH | 35        | Vit D3             | VITAMIN_D                 |
| DASH         | 36        | Propafenon         | ANTIARRYTHMIC             |
| DASH         | 36        | Xarelto            | ANTICOAGULANT             |
| DASH         | 36        | Bisoprolol         | BETA_BLOCKER              |
| DASH         | 36        | Hydrochlorothiazid | DIURETIC                  |
| DASH         | 36        | Triamteren         | DIURETIC                  |
| DASH         | 36        | Metformin          | METFORMIN                 |
| DASH         | 36        | Pantoprazol        | PPI                       |

Table S2 drug classes

| StudyArm     | PatientID | Drug               | DrugClasses               |
|--------------|-----------|--------------------|---------------------------|
| DASH         | 36        | Atorvastatin       | STATIN                    |
| DASH         | 36        | Allopurinol        | XANTHAN_OXIDASE_INHIBITOR |
| fasting+DASH | 37        | Ramipril           | ACE_INHIBITOR             |
| fasting+DASH | 37        | Amlodipin          | CALCIUMANTAGONIST         |
| DASH         | 38        | Sitagliptin        | ANTIDIABETIC              |
| DASH         | 38        | Olmесartan         | AT2_BLOCKER               |
| DASH         | 38        | Toraseмid          | DIURETIC                  |
| DASH         | 38        | Folic acid         | FOLIC_ACID                |
| DASH         | 38        | Metformin          | METFORMIN                 |
| DASH         | 38        | Spironolacton      | DIURETIC                  |
| fasting+DASH | 39        | L-Thyroxin         | THYROID                   |
| fasting+DASH | 39        | NO_aHT             | NO_aHT                    |
| DASH         | 40        | Enalapril          | ACE_INHIBITOR             |
| DASH         | 40        | Liraglutid         | ANTIDIABETIC              |
| DASH         | 40        | Sitagliptin        | ANTIDIABETIC              |
| DASH         | 40        | Metformin          | METFORMIN                 |
| DASH         | 40        | Atorvastatin       | STATIN                    |
| DASH         | 41        | Doxazosin          | ALPHA_I_BLOCKER           |
| DASH         | 41        | ASS                | ANTI_PLATELET             |
| DASH         | 41        | Olmесartan         | AT2_BLOCKER               |
| DASH         | 41        | Metoprolol         | BETA_BLOCKER              |
| DASH         | 41        | Hydrochlorothiazid | DIURETIC                  |
| DASH         | 41        | Metformin          | METFORMIN                 |
| DASH         | 41        | Pantoprazol        | PPI                       |
| DASH         | 41        | Pravastatin        | STATIN                    |
| DASH         | 42        | Enalapril          | ACE_INHIBITOR             |
| DASH         | 42        | Glimepirid         | ANTIDIABETIC              |
| DASH         | 42        | Metformin          | METFORMIN                 |
| DASH         | 42        | Simvastatin        | STATIN                    |
| fasting+DASH | 43        | NONE               | NONE                      |
| DASH         | 44        | ASS                | ANTI_PLATELET             |
| DASH         | 44        | NO_aHT             | NO_aHT                    |
| DASH         | 44        | Fluticason         | CORTICOSTEROID            |
| fasting+DASH | 45        | Bisoprolol         | BETA_BLOCKER              |
| fasting+DASH | 45        | Vit D3             | VITAMIN_D                 |
| fasting+DASH | 46        | Valsartan          | AT2_BLOCKER               |
| fasting+DASH | 46        | Amlodipin          | CALCIUMANTAGONIST         |
| fasting+DASH | 47        | Valsartan          | AT2_BLOCKER               |
| fasting+DASH | 47        | Simvastatin        | STATIN                    |
| DASH         | 48        | Candesartan        | AT2_BLOCKER               |
| DASH         | 48        | Montelukast        | LEUKOTRIENE_ANTAGONIST    |
| DASH         | 48        | Atorvastatin       | STATIN                    |
| DASH         | 48        | L-Thyroxin         | THYROID                   |
| fasting+DASH | 49        | Ramipril           | ACE_INHIBITOR             |
| fasting+DASH | 49        | Dapagliflozin      | ANTIDIABETIC              |
| fasting+DASH | 49        | Glimepirid         | ANTIDIABETIC              |
| fasting+DASH | 49        | Nebivolol          | BETA_BLOCKER              |
| fasting+DASH | 49        | Metformin          | METFORMIN                 |
| fasting+DASH | 49        | Atorvastatin       | STATIN                    |

Table S2 drug classes

| StudyArm     | PatientID | Drug               | DrugClasses               |
|--------------|-----------|--------------------|---------------------------|
| fasting+DASH | 50        | Bisoprolol         | BETA_BLOCKER              |
| fasting+DASH | 50        | Metformin          | METFORMIN                 |
| fasting+DASH | 50        | L-Thyroxin         | THYROID                   |
| DASH         | 51        | Valsartan          | AT2_BLOCKER               |
| DASH         | 51        | Amlodipin          | CALCIUMANTAGONIST         |
| DASH         | 51        | Hydrochlorothiazid | DIURETIC                  |
| DASH         | 51        | Ibuprofen          | NSAID                     |
| fasting+DASH | 52        | Ramipril           | ACE_INHIBITOR             |
| fasting+DASH | 52        | Metoprolol         | BETA_BLOCKER              |
| fasting+DASH | 52        | Iodine             | IODINE                    |
| fasting+DASH | 52        | L-Thyroxin         | THYROID                   |
| DASH         | 53        | Valsartan          | AT2_BLOCKER               |
| DASH         | 53        | Hydrochlorothiazid | DIURETIC                  |
| DASH         | 54        | Ramipril           | ACE_INHIBITOR             |
| DASH         | 54        | Amitryptilin       | ANTIDEPRESSANT            |
| DASH         | 54        | Bupropion          | ANTIDEPRESSANT            |
| DASH         | 54        | Salbutamol         | BETA_2_AGONIST            |
| DASH         | 54        | Tramadol           | OPIATE                    |
| fasting+DASH | 55        | Losartan           | AT2_BLOCKER               |
| fasting+DASH | 55        | Metformin          | METFORMIN                 |
| fasting+DASH | 55        | Simvastatin        | STATIN                    |
| fasting+DASH | 55        | L-Thyroxin         | THYROID                   |
| fasting+DASH | 55        | Allopurinol        | XANTHAN_OXIDASE_INHIBITOR |
| DASH         | 56        | Sitagliptin        | ANTIDIABETIC              |
| DASH         | 56        | Candesartan        | AT2_BLOCKER               |
| DASH         | 56        | Nitrendipin        | CALCIUMANTAGONIST         |
| DASH         | 56        | Hydrochlorothiazid | DIURETIC                  |
| DASH         | 56        | Moxonidin          | IMIDAZOLE_AGONIST         |
| DASH         | 56        | Metformin          | METFORMIN                 |
| DASH         | 56        | Spironolacton      | DIURETIC                  |
| DASH         | 56        | Simvastatin        | STATIN                    |
| DASH         | 56        | L-Thyroxin         | THYROID                   |
| DASH         | 57        | Irbesartan         | AT2_BLOCKER               |
| DASH         | 57        | Bisoprolol         | BETA_BLOCKER              |
| DASH         | 57        | Hydrochlorothiazid | DIURETIC                  |
| DASH         | 57        | Metformin          | METFORMIN                 |
| DASH         | 57        | Tyrosin            | THYROID                   |
| DASH         | 57        | Vit D3             | VITAMIN_D                 |
| fasting+DASH | 58        | Tamsulosin         | ALPHA_I_BLOCKER_BPH       |
| fasting+DASH | 58        | Dutasterid         | DHT_INHIBITOR             |
| fasting+DASH | 58        | Iodine             | IODINE                    |
| fasting+DASH | 59        | Nitrolingual Spray | VASODILATATOR             |
| fasting+DASH | 59        | Valsartan          | AT2_BLOCKER               |
| fasting+DASH | 59        | Metoprolol         | BETA_BLOCKER              |
| fasting+DASH | 59        | Lercanidipin       | CALCIUMANTAGONIST         |
| fasting+DASH | 59        | Furosemid          | DIURETIC                  |
| fasting+DASH | 59        | Hydrochlorothiazid | DIURETIC                  |
| fasting+DASH | 59        | Moxonidin          | IMIDAZOLE_AGONIST         |
| fasting+DASH | 59        | Spironolacton      | DIURETIC                  |

Table S2 drug classes

| StudyArm     | PatientID | Drug               | DrugClasses               |
|--------------|-----------|--------------------|---------------------------|
| DASH         | 60        | ASS                | ANTI_PLATELET             |
| DASH         | 60        | Metoprolol         | BETA_BLOCKER              |
| DASH         | 60        | Amlodipin          | CALCIUMANTAGONIST         |
| DASH         | 60        | Furosemid          | DIURETIC                  |
| DASH         | 60        | L-Thyroxin         | THYROID                   |
| fasting+DASH | 61        | Ramipril           | ACE_INHIBITOR             |
| fasting+DASH | 61        | Folic acid         | FOLIC_ACID                |
| fasting+DASH | 61        | Vit D3             | VITAMIN_D                 |
| fasting+DASH | 62        | Losartan           | AT2_BLOCKER               |
| fasting+DASH | 62        | Desogestrel        | PROGESTERON               |
| DASH         | 63        | Dapagliflozin      | ANTIDIABETIC              |
| DASH         | 63        | Sitagliptin        | ANTIDIABETIC              |
| DASH         | 63        | Candesartan        | AT2_BLOCKER               |
| DASH         | 63        | Bisoprolol         | BETA_BLOCKER              |
| DASH         | 63        | Metformin          | METFORMIN                 |
| DASH         | 63        | Tolterodin         | OTHER_PARASYMPATHOLYTICS  |
| DASH         | 63        | Atorvastatin       | STATIN                    |
| DASH         | 63        | Allopurinol        | XANTHAN_OXIDASE_INHIBITOR |
| fasting+DASH | 64        | Valsartan          | AT2_BLOCKER               |
| fasting+DASH | 64        | Atenolol           | BETA_BLOCKER              |
| fasting+DASH | 64        | Diclofenac         | NSAID                     |
| fasting+DASH | 64        | Pantoprazol        | PPI                       |
| fasting+DASH | 64        | L-Thyroxin         | THYROID                   |
| fasting+DASH | 65        | Ramipril           | ACE_INHIBITOR             |
| fasting+DASH | 65        | Pregabalin         | ANTICONVULSIVE            |
| fasting+DASH | 65        | Aromataseinhibitor | DHT_INHIBITOR             |
| DASH         | 66        | Ramipril           | ACE_INHIBITOR             |
| DASH         | 66        | Metoprolol         | BETA_BLOCKER              |
| DASH         | 66        | Hydrochlorothiazid | DIURETIC                  |
| DASH         | 66        | L-Thyroxin         | THYROID                   |
| fasting+DASH | 67        | NONE               | NONE                      |
| fasting+DASH | 68        | Candesartan        | AT2_BLOCKER               |
| fasting+DASH | 68        | Valsartan          | AT2_BLOCKER               |
| fasting+DASH | 68        | Diclofenac         | NSAID                     |
| fasting+DASH | 68        | L-Thyroxin         | THYROID                   |
| fasting+DASH | 68        | Vit D3             | VITAMIN_D                 |
| DASH         | 69        | Timolol eye drops  | EYE_BETA_BLOCKER          |
| DASH         | 69        | NO_aHT             | NO_aHT                    |
| DASH         | 70        | Sitagliptin        | ANTIDIABETIC              |
| DASH         | 70        | Irbesartan         | AT2_BLOCKER               |
| DASH         | 70        | Metformin          | METFORMIN                 |
| DASH         | 72        | Candesartan        | AT2_BLOCKER               |
| DASH         | 72        | Bisoprolol         | BETA_BLOCKER              |
| DASH         | 72        | Amlodipin          | CALCIUMANTAGONIST         |
| DASH         | 73        | Ibuprofen          | NSAID                     |
| DASH         | 73        | Valsartan          | AT2_BLOCKER               |
| DASH         | 73        | Amlodipin          | CALCIUMANTAGONIST         |
| DASH         | 73        | Hydrochlorothiazid | DIURETIC                  |
| DASH         | 73        | Torasemid          | DIURETIC                  |

Table S2 drug classes

| StudyArm     | PatientID | Drug               | DrugClasses |
|--------------|-----------|--------------------|-------------|
| DASH         | 73        | Tramadol           | OPIATE      |
| DASH         | 73        | Pantoprazol        | PPI         |
| DASH         | 73        | Simvastatin        | STATIN      |
| fasting+DASH | 74        | Losartan           | AT2_BLOCKER |
| fasting+DASH | 74        | Hydrochlorothiazid | DIURETIC    |

Table S2 drug data

| Subject | Drug                   | Unit      | DoseV1 | DoseV2 | DoseV3 | V1_normalized | V3_in_relation to_V1 | Drug class                  |
|---------|------------------------|-----------|--------|--------|--------|---------------|----------------------|-----------------------------|
| 1       | Ramipril               | mg        | 7.5    | 7.5    | 7.5    | 1             | 1                    | 1 ACE_INHIBITOR             |
| 1       | Aspirin                | mg        | 100    | 100    | 100    | 1             | 1                    | 1 ANTI_PLATELET             |
| 1       | Metoprolol             | mg        | 75     | 75     | 75     | 1             | 1                    | 1 BETA_BLOCKER              |
| 1       | Metformin              | mg        | 0      | 0      | 0      | 0             | 0                    | 0 METFORMIN                 |
| 1       | Pantoprazole           | mg        | 20     | 0      | 0      | 1             | 1                    | 0 PPI                       |
| 1       | Simvastatin            | mg        | 10     | 0      | 0      | 1             | 1                    | 0 STATIN                    |
| 1       | L-Thyroxine            | microgram | 50     | 50     | 50     | 1             | 1                    | 1 THYROID                   |
| 2       | Ramipril               | mg        | 5      | 0      | 2.5    | 1             | 1                    | 0.5 ACE_INHIBITOR           |
| 2       | Beclometasonpropionate | microgram | 500    | 0      | 0      | 1             | 1                    | 0 CORTICOSTEROID            |
| 2       | Hydrochlorothiazide    | mg        | 25     | 0      | 0      | 1             | 1                    | 0 DIURETIC                  |
| 2       | Simvastatin            | mg        | 20     | 10     | 20     | 1             | 1                    | 1 STATIN                    |
| 3       | Ramipril               | mg        | 10     | 10     | 10     | 1             | 1                    | 1 ACE_INHIBITOR             |
| 3       | Amlodipine             | mg        | 10     | 10     | 10     | 1             | 1                    | 1 CALCIUMANTAGONIST         |
| 3       | Hydrochlorothiazide    | mg        | 25     | 0      | 0      | 1             | 1                    | 0 DIURETIC                  |
| 3       | Moxonidine             | mg        | 0.3    | 0.3    | 0.3    | 1             | 1                    | 1 IMIDAZOLE_AGONIST         |
| 3       | Simvastatin            | mg        | 20     | 20     | 20     | 1             | 1                    | 1 STATIN                    |
| 4       | Valsartan              | mg        | 160    | 160    | 160    | 1             | 1                    | 1 AT2_BLOCKER               |
| 4       | Bisoprolol             | mg        | 5      | 5      | 5      | 1             | 1                    | 1 BETA_BLOCKER              |
| 4       | Amlodipine             | mg        | 5      | 5      | 5      | 1             | 1                    | 1 CALCIUMANTAGONIST         |
| 4       | Hydrochlorothiazide    | mg        | 12.5   | 12.5   | 12.5   | 1             | 1                    | 1 DIURETIC                  |
| 5       | Metoprolol             | mg        | 50     | 50     | 50     | 1             | 1                    | 1 BETA_BLOCKER              |
| 5       | Spironolacton          | mg        | 50     | 50     | 50     | 1             | 1                    | 1 DIURETIC                  |
| 7       | Candesartan            | mg        | 16     | 16     | 16     | 1             | 1                    | 1 AT2_BLOCKER               |
| 7       | Timolol                | mg        | 0.25   | 0.25   | 0.25   | 1             | 1                    | 1 EYE_BETA_BLOCKER          |
| 7       | Amiloride              | mg        | 5.68   | 5.68   | 5.68   | 1             | 1                    | 1 DIURETIC                  |
| 7       | Hydrochlorothiazide    | mg        | 50     | 50     | 50     | 1             | 1                    | 1 DIURETIC                  |
| 8       | Ramipril               | mg        | 5      | 5      | 10     | 1             | 1                    | 2 ACE_INHIBITOR             |
| 8       | Amlodipine             | mg        | 5      | 5      | 10     | 1             | 1                    | 2 CALCIUMANTAGONIST         |
| 8       | Hydrochlorothiazide    | mg        | 10     | 10     | 12.5   | 1             | 1                    | 1.25 DIURETIC               |
| 8       | Metformin              | mg        | 2000   | 2000   | 2000   | 1             | 1                    | 1 METFORMIN                 |
| 9       | Telmisartan            | mg        | 80     | 80     | 80     | 1             | 1                    | 1 AT2_BLOCKER               |
| 9       | Amlodipine             | mg        | 10     | 10     | 10     | 1             | 1                    | 1 CALCIUMANTAGONIST         |
| 9       | Prednisolone           | mg        | 0      | 0      | 5      | 0             | 0                    | 1 CORTICOSTEROID            |
| 9       | Hydrochlorothiazide    | mg        | 25     | 25     | 12.5   | 1             | 1                    | 0.5 DIURETIC                |
| 9       | Moxonidine             | mg        | 0.15   | 0.15   | 0.3    | 1             | 1                    | 2 IMIDAZOLE_AGONIST         |
| 9       | Metformin              | mg        | 2000   | 2000   | 1000   | 1             | 1                    | 0.5 METFORMIN               |
| 9       | Pantoprazole           | mg        | 20     | 20     | 0      | 1             | 1                    | 0 PPI                       |
| 9       | Testosterone           | mg/g      | 50     | 50     | 50     | 1             | 1                    | 1 TESTOSTERONE              |
| 9       | L-Thyroxine            | microgram | 100    | 100    | 100    | 1             | 1                    | 1 THYROID                   |
| 9       | Vit B12                | microgram | 250    | 250    | 1000   | 1             | 1                    | 4 VITAMIN_B12               |
| 9       | Vit D3                 | IU        | 10000  | 10000  | 1000   | 1             | 1                    | 0.1 VITAMIN_D               |
| 11      | Tamsulosin             | mg        | 0.4    | 0.4    | 0.4    | 1             | 1                    | 1 ALPHA_I_BLOCKER_BPH       |
| 11      | Aspirin                | mg        | 100    | 100    | 100    | 1             | 1                    | 1 ANTI_PLATELET             |
| 11      | Vildagliptin           | mg        | 50     | 50     | 50     | 1             | 1                    | 1 ANTIDIABETIC              |
| 11      | Metformin              | mg        | 520    | 520    | 520    | 1             | 1                    | 1 METFORMIN                 |
| 11      | Atorvastatin           | mg        | 10     | 10     | 10     | 1             | 1                    | 1 STATIN                    |
| 11      | Finasteride            | mg        | 5      | 5      | 5      | 1             | 1                    | 1 TESTOSTERONE_INHIBITOR    |
| 11      | L-Thyroxine            | microgram | 75     | 75     | 75     | 1             | 1                    | 1 THYROID                   |
| 12      | Lisinopril             | mg        | 5      | 5      | 5      | 1             | 1                    | 1 ACE_INHIBITOR             |
| 12      | Tamsulosin             | mg        | 0.4    | 0.4    | 0.4    | 1             | 1                    | 1 ALPHA_I_BLOCKER_BPH       |
| 12      | Levocetirizine         | mg        | 5      | 5      | 0      | 1             | 1                    | 0 ANTIHISTAMINE             |
| 12      | Salbutamol             | microgram | NEED   | NEED   | NEED   | 0             | 0                    | 0 BETA_2_AGONIST            |
| 13      | NONE                   | NA        | NONE   | NONE   | NONE   | 0             | 0                    | 0 NONE                      |
| 14      | Omega 3 FA             | mg        | 1000   | 1000   | 1000   | 1             | 1                    | 1 OMEGA_3                   |
| 14      | NO_aHT                 | NA        | NO_aHT | NO_aHT | NO_aHT | 0             | 0                    | 0 NO_aHT                    |
| 15      | Ramipril               | mg        | 2.5    | 2.5    | 0      | 1             | 1                    | 0 ACE_INHIBITOR             |
| 16      | Ramipril               | mg        | 5      | 5      | 5      | 1             | 1                    | 1 ACE_INHIBITOR             |
| 16      | Amlodipine             | mg        | 5      | 0      | 0      | 1             | 1                    | 0 CALCIUMANTAGONIST         |
| 17      | Citalopram             | mg        | 10     | 10     | 10     | 1             | 1                    | 1 ANTIDEPRESSANT            |
| 17      | Valsartan              | mg        | 80     | 80     | 80     | 1             | 1                    | 1 AT2_BLOCKER               |
| 17      | Metoprolol             | mg        | 100    | 100    | 100    | 1             | 1                    | 1 BETA_BLOCKER              |
| 17      | Ibrandronic acid       | mg        | 3      | 3      | 3      | 1             | 1                    | 1 BISPHOSPHONATE            |
| 17      | Hydrochlorothiazide    | mg        | 12.5   | 12.5   | 12.5   | 1             | 1                    | 1 DIURETIC                  |
| 17      | Torsemide              | mg        | 5      | 5      | 5      | 1             | 1                    | 1 DIURETIC                  |
| 17      | Tilidin                | mg        | 300    | 300    | 300    | 1             | 1                    | 1 OPIATE                    |
| 17      | Ezetimib               | mg        | 10     | 10     | 10     | 1             | 1                    | 1 CHOL_ABS_INHIBITOR        |
| 17      | Simvastatin            | mg        | 20     | 20     | 20     | 1             | 1                    | 1 STATIN                    |
| 17      | Vit D3                 | IU        | 20000  | 20000  | 20000  | 1             | 1                    | 1 VITAMIN_D                 |
| 17      | Allopurinol            | mg        | 100    | 100    | 100    | 1             | 1                    | 1 XANTHAN_OXIDASE_INHIBITOR |
| 18      | NONE                   | NA        | NONE   | NONE   | NONE   | 0             | 0                    | 0 NONE                      |
| 19      | Ramipril               | mg        | 10     | 10     | 10     | 1             | 1                    | 1 ACE_INHIBITOR             |
| 19      | Amlodipine             | mg        | 5      | 5      | 5      | 1             | 1                    | 1 CALCIUMANTAGONIST         |
| 19      | Metformin              | mg        | 1000   | 1000   | 1000   | 1             | 1                    | 1 METFORMIN                 |
| 20      | Candesartan            | mg        | 32     | 32     | 32     | 1             | 1                    | 1 AT2_BLOCKER               |
| 20      | Prednisolone           | mg        | 10     | 10     | 10     | 1             | 1                    | 1 CORTICOSTEROID            |
| 20      | Pantoprazole           | mg        | 20     | 20     | 20     | 1             | 1                    | 1 PPI                       |
| 20      | L-Thyroxine            | microgram | 75     | 75     | 75     | 1             | 1                    | 1 THYROID                   |
| 21      | Nebivolol              | mg        | 5      | 2.5    | 5      | 1             | 1                    | 1 BETA_BLOCKER              |
| 21      | Amlodipine             | mg        | 2.5    | 0      | 0      | 1             | 1                    | 0 CALCIUMANTAGONIST         |
| 22      | Ramipril               | mg        | 10     | 10     | 10     | 1             | 1                    | 1 ACE_INHIBITOR             |
| 22      | Tamsulosin             | mg        | 0.4    | 0.4    | 0.4    | 1             | 1                    | 1 ALPHA_I_BLOCKER_BPH       |
| 22      | Tiotropium             | microgram | 18     | 18     | 18     | 1             | 1                    | 1 ANTICHOLINERGIC           |



Table S2 drug data

| Subject | Drug                | Unit      | DoseV1 | DoseV2 | DoseV3 | V1_normalized | V3_in_relation to_V1 | Drug class                |
|---------|---------------------|-----------|--------|--------|--------|---------------|----------------------|---------------------------|
| 22      | Nebivolol           | mg        | 5      | 5      | 5      | 1             | 1                    | BETA_BLOCKER              |
| 22      | Lercanidipine       | mg        | 10     | 10     | 10     | 1             | 1                    | CALCIUMANTAGONIST         |
| 22      | Hydrochlorothiazide | mg        | 12.5   | 12.5   | 12.5   | 1             | 1                    | DIURETIC                  |
| 22      | Metformin           | mg        | 1000   | 1000   | 1000   | 1             | 1                    | METFORMIN                 |
| 22      | Atorvastatin        | mg        | 20     | 20     | 20     | 1             | 1                    | STATIN                    |
| 23      | Olmesartan          | mg        | 40     | 40     | 0      | 1             | 0                    | AT2_BLOCKER               |
| 23      | Amlodipine          | mg        | 5      | 5      | 0      | 1             | 0                    | CALCIUMANTAGONIST         |
| 23      | Hydrochlorothiazide | mg        | 12.5   | 12.5   | 0      | 1             | 0                    | DIURETIC                  |
| 24      | Fluoxetine          | mg        | 40     | 40     | 40     | 1             | 1                    | ANTIDEPRESSANT            |
| 24      | Valsartan           | mg        | 40     | 40     | 40     | 1             | 1                    | AT2_BLOCKER               |
| 24      | Metoprolol          | mg        | 95     | 0      | 0      | 1             | 0                    | BETA_BLOCKER              |
| 25      | Doxazosin           | mg        | 4      | 4      | 4      | 1             | 1                    | ALPHA_I_BLOCKER           |
| 25      | Liraglutid          | mg        | 1.2    | 1.2    | 1.2    | 1             | 1                    | ANTIIDIABETIC             |
| 25      | Simvastatin         | mg        | 10     | 10     | 10     | 1             | 1                    | STATIN                    |
| 25      | Allopurinol         | mg        | 100    | 100    | 100    | 1             | 1                    | XANTHAN_OXIDASE_INHIBITOR |
| 26      | Hydrochlorothiazide | mg        | 25     | 0      | 0      | 1             | 0                    | DIURETIC                  |
| 26      | Triamteren          | mg        | 50     | 0      | 0      | 1             | 0                    | DIURETIC                  |
| 27      | Nebivolol           | mg        | 2.5    | 2.5    | 1.25   | 1             | 0.5                  | BETA_BLOCKER              |
| 28      | Lercanidipine       | mg        | 10     | 5      | 5      | 1             | 0.5                  | CALCIUMANTAGONIST         |
| 28      | Vit D3              | IU        | 20000  | 200000 | 0      | 1             | 0                    | VITAMIN_D                 |
| 29      | Candesartan         | mg        | 32     | 32     | 32     | 1             | 1                    | AT2_BLOCKER               |
| 29      | Amlodipine          | mg        | 5      | 5      | 5      | 1             | 1                    | CALCIUMANTAGONIST         |
| 30      | Estradiol           | mg        | 1      | 1      | 1      | 1             | 1                    | ESTROGEN                  |
| 30      | Symbioflor          | NA        | NA     | NA     | NA     | NA            | NA                   | PROBIOTIKUM               |
| 30      | Levonogestrel       | microgram | 0.04   | 0.04   | 0.04   | 1             | 1                    | PROGESTERON               |
| 30      | NO_aHT              | NA        | NO_aHT | NO_aHT | NO_aHT | 0             | 0                    | NO_aHT                    |
| 31      | Lisinopril          | mg        | 20     | 20     | 20     | 1             | 1                    | ACE_INHIBITOR             |
| 31      | Aspirin             | mg        | 100    | 100    | 0      | 1             | 0                    | ANTI_PLATELET             |
| 31      | Glimepiride         | mg        | 1      | 1      | 1      | 1             | 1                    | ANTIIDIABETIC             |
| 31      | Bisoprolol          | mg        | 5      | 5      | 5      | 1             | 1                    | BETA_BLOCKER              |
| 31      | Lercanidipine       | mg        | 10     | 10     | 10     | 1             | 1                    | CALCIUMANTAGONIST         |
| 31      | Hydrochlorothiazide | mg        | 25     | 25     | 25     | 1             | 1                    | DIURETIC                  |
| 31      | Metformin           | mg        | 2000   | 2000   | 2000   | 1             | 1                    | METFORMIN                 |
| 31      | Simvastatin         | mg        | 20     | 20     | 20     | 1             | 1                    | STATIN                    |
| 32      | Metformin           | mg        | 1000   | 1000   | 1000   | 1             | 1                    | METFORMIN                 |
| 32      | Pantoprazole        | mg        | 40     | 40     | 40     | 1             | 1                    | PPI                       |
| 32      | NO_aHT              | NA        | NO_aHT | NO_aHT | NO_aHT | 0             | 0                    | NO_aHT                    |
| 33      | Valsartan           | mg        | 160    | 160    | 160    | 1             | 1                    | AT2_BLOCKER               |
| 33      | Metformin           | mg        | 3000   | 0      | 2000   | 1             | 0.666666667          | METFORMIN                 |
| 33      | Jecoris oleum       | NA        | 1      | 1      | 0      | 1             | 0                    | OMEGA_3                   |
| 33      | Pravastatin         | mg        | 20     | 20     | 20     | 1             | 1                    | STATIN                    |
| 33      | Jecoris oleum       | NA        | 1      | 1      | 0      | 1             | 0                    | VITAMIN_A                 |
| 33      | Jecoris oleum       | NA        | 1      | 1      | 0      | 1             | 0                    | VITAMIN_D                 |
| 33      | Allopurinol         | mg        | 0      | 300    | 0      | 0             | 0                    | XANTHAN_OXIDASE_INHIBITOR |
| 34      | Losartan            | mg        | 50     | 25     | 50     | 1             | 1                    | AT2_BLOCKER               |
| 34      | Salmeterol spary    | microgram | NEED   | NEED   | NEED   | 0             | 0                    | BETA_2_AGONIST            |
| 34      | Flutide Spray       | microgram | NEED   | NEED   | NEED   | NA            | NA                   | CORTICOSTEROID            |
| 34      | Hydrochlorothiazide | mg        | 10     | 0      | 0      | 1             | 0                    | DIURETIC                  |
| 34      | Loratadine          | mg        | 10     | 10     | 10     | 1             | 1                    | HISTAMINE_INHIBITOR       |
| 34      | Theophyllin retard  | mg        | 300    | 300    | 300    | 1             | 1                    | THEOPHYLLIN               |
| 35      | Duloxetine          | mg        | 60     | 60     | 60     | 1             | 1                    | ANTIDEPRESSANT            |
| 35      | Aliskiren           | mg        | 300    | 300    | 300    | 1             | 1                    | RENIN_INHIBITOR           |
| 35      | Metoprolol          | mg        | 47.5   | 47.5   | 47.5   | 1             | 1                    | BETA_BLOCKER              |
| 35      | Clonidine           | mg        | 75     | 75     | 75     | 1             | 1                    | IMIDAZOLE_AGONIST         |
| 35      | Metformin           | mg        | 2000   | 0      | 2000   | 1             | 1                    | METFORMIN                 |
| 35      | Pantoprazole        | mg        | 20     | 20     | 20     | 1             | 1                    | PPI                       |
| 35      | L-Thyroxine         | microgram | 88     | 0      | 88     | 1             | 1                    | THYROID                   |
| 35      | Vit D3              | IU        | 40000  | 20000  | 20000  | 1             | 0.5                  | VITAMIN_D                 |
| 36      | Propafenone         | mg        | 325    | 325    | 650    | 1             | 2                    | ANTIARRYTHMIC             |
| 36      | Rivaroxaban         | mg        | 20     | 20     | 20     | 1             | 1                    | ANTICOAGULANT             |
| 36      | Bisoprolol          | mg        | 2.5    | 2.5    | 2.5    | 1             | 1                    | BETA_BLOCKER              |
| 36      | Hydrochlorothiazide | mg        | 25     | 25     | 12.5   | 1             | 0.5                  | DIURETIC                  |
| 36      | Triamterene         | mg        | 50     | 50     | 50     | 1             | 1                    | DIURETIC                  |
| 36      | Metformin           | mg        | 2000   | 2000   | 2000   | 1             | 1                    | METFORMIN                 |
| 36      | Pantoprazole        | mg        | 40     | 40     | 40     | 1             | 1                    | PPI                       |
| 36      | Atorvastatin        | mg        | 10     | 10     | 10     | 1             | 1                    | STATIN                    |
| 36      | Allopurinol         | mg        | 0      | 0      | 150    | 0             | 1                    | XANTHAN_OXIDASE_INHIBITOR |
| 37      | Ramipril            | mg        | 10     | 5      | 10     | 1             | 1                    | ACE_INHIBITOR             |
| 37      | Amlodipine          | mg        | 5      | 5      | 5      | 1             | 1                    | CALCIUMANTAGONIST         |
| 38      | Sitagliptin         | mg        | 100    | 100    | 100    | 1             | 1                    | ANTIIDIABETIC             |
| 38      | Olmesartan          | mg        | 40     | 40     | 40     | 1             | 1                    | AT2_BLOCKER               |
| 38      | Torsemide           | mg        | 10     | 10     | 10     | 1             | 1                    | DIURETIC                  |
| 38      | Folic acid          | mg        | 0      | 0      | 0      | 0             | 0                    | FOLIC_ACID                |
| 38      | Metformin           | mg        | 2000   | 2000   | 2000   | 1             | 1                    | METFORMIN                 |
| 38      | Spironolactone      | mg        | 100    | 100    | 100    | 1             | 1                    | DIURETIC                  |
| 39      | L-Thyroxine         | microgram | 125    | 0      | 125    | 1             | 1                    | THYROID                   |
| 39      | NO_aHT              | NA        | NO_aHT | NO_aHT | NO_aHT | 0             | 0                    | NO_aHT                    |
| 40      | Enalapril           | mg        | 10     | 10     | 10     | 1             | 1                    | ACE_INHIBITOR             |
| 40      | Liraglutid          | m         | 1.2    | 1.2    | 1.2    | 1             | 1                    | ANTIIDIABETIC             |
| 40      | Sitagliptin         | mg        | 100    | 100    | 100    | 1             | 1                    | ANTIIDIABETIC             |
| 40      | Metformin           | mg        | 2000   | 2000   | 2000   | 1             | 1                    | METFORMIN                 |
| 40      | Atorvastatin        | mg        | 20     | 20     | 20     | 1             | 1                    | STATIN                    |

Table S2 drug data

| Subject | Drug                | Unit      | DoseV1 | DoseV2 | DoseV3 | V1_normalized | V3_in_relation to_V1 | Drug class                    |
|---------|---------------------|-----------|--------|--------|--------|---------------|----------------------|-------------------------------|
| 41      | Doxazosin           | mg        | 2      | 2      | 2      | 1             | 1                    | 1 ALPHA_I_BLOCKER             |
| 41      | Aspirin             | mg        | 100    | 100    | 0      | 1             | 0                    | 0 ANTI_PLATELET               |
| 41      | Olmesartan          | mg        | 20     | 20     | 20     | 1             | 1                    | 1 AT2_BLOCKER                 |
| 41      | Metoprolol          | mg        | 118.75 | 118.75 | 118.75 | 1             | 1                    | 1 BETA_BLOCKER                |
| 41      | Hydrochlorothiazide | mg        | 25     | 25     | 25     | 1             | 1                    | 1 DIURETIC                    |
| 41      | Metformin           | mg        | 1500   | 1500   | 1500   | 1             | 1                    | 1 METFORMIN                   |
| 41      | Pantoprazole        | mg        | NEED   | NEED   | NEED   | 0             | 0                    | 0 PPI                         |
| 41      | Pravastatin         | mg        | 10     | 10     | 10     | 1             | 1                    | 1 STATIN                      |
| 42      | Enalapril           | mg        | 10     | 10     | 10     | 1             | 1                    | 1 ACE_INHIBITOR               |
| 42      | Glimepiride         | mg        | 2      | 2      | 2      | 1             | 1                    | 1 ANTIDIABETIC                |
| 42      | Metformin           | mg        | 2550   | 2550   | 2550   | 1             | 1                    | 1 METFORMIN                   |
| 42      | Simvastatin         | mg        | 20     | 20     | 20     | 1             | 1                    | 1 STATIN                      |
| 43      | NONE                | NA        | NONE   | NONE   | NONE   | 0             | 0                    | 0 NONE                        |
| 44      | Aspirin             | mg        | 0      | 2000   | 0      | 0             | 0                    | 0 ANTI_PLATELET               |
| 44      | NO_aHT              | NA        | NO_aHT | NO_aHT | NO_aHT | 0             | 0                    | 0 NO_aHT                      |
| 44      | Fluticasone         | microgram | 2      | 2      | 2      | 1             | 1                    | 1 CORTICOSTEROID              |
| 45      | Bisoprolol          | mg        | 10     | 10     | 0      | 1             | 0                    | 0 BETA_BLOCKER                |
| 45      | Vit D3              | IU        | 1000   | 0      | 0      | 1             | 0                    | 0 VITAMIN_D                   |
| 46      | Valsartan           | mg        | 160    | 0      | 160    | 1             | 1                    | 1 AT2_BLOCKER                 |
| 46      | Amlodipine          | mg        | 2.5    | 0      | 2.5    | 1             | 1                    | 1 CALCIUMANTAGONIST           |
| 47      | Valsartan           | mg        | 160    | 160    | 80     | 1             | 0.5                  | 0.5 AT2_BLOCKER               |
| 47      | Simvastatin         | mg        | 10     | 10     | 10     | 1             | 1                    | 1 STATIN                      |
| 48      | Candesartan         | mg        | 4      | 0      | 0      | 1             | 0                    | 0 AT2_BLOCKER                 |
| 48      | Montelukast         | mg        | 10     | 10     | 10     | 1             | 1                    | 1 LEUKOTRIENE_ANTAGONIST      |
| 48      | Atorvastatin        | mg        | 10     | 10     | 5      | 1             | 0.5                  | 0.5 STATIN                    |
| 48      | L-Thyroxine         | microgram | 88     | 88     | 88     | 1             | 1                    | 1 THYROID                     |
| 49      | Ramipril            | mg        | 5      | 7.5    | 5      | 1             | 1                    | 1 ACE_INHIBITOR               |
| 49      | Dapagliflozin       | mg        | 10     | 0      | 10     | 1             | 1                    | 1 ANTIDIABETIC                |
| 49      | Glimepiride         | mg        | 3      | 0      | 0      | 1             | 0                    | 0 ANTIDIABETIC                |
| 49      | Nebivolol           | mg        | 10     | 5      | 10     | 1             | 1                    | 1 BETA_BLOCKER                |
| 49      | Metformin           | mg        | 2000   | 0      | 2000   | 1             | 1                    | 1 METFORMIN                   |
| 49      | Atorvastatin        | mg        | 40     | 40     | 40     | 1             | 1                    | 1 STATIN                      |
| 50      | Bisoprolol          | mg        | 5      | 5      | 0      | 1             | 0                    | 0 BETA_BLOCKER                |
| 50      | Metformin           | mg        | 2000   | 0      | 0      | 1             | 0                    | 0 METFORMIN                   |
| 50      | L-Thyroxine         | microgram | 150    | 150    | 0      | 1             | 0                    | 0 THYROID                     |
| 51      | Valsartan           | mg        | 320    | 320    | 640    | 1             | 2                    | 2 AT2_BLOCKER                 |
| 51      | Amlodipine          | mg        | 10     | 10     | 20     | 1             | 2                    | 2 CALCIUMANTAGONIST           |
| 51      | Hydrochlorothiazide | mg        | 25     | 25     | 50     | 1             | 2                    | 2 DIURETIC                    |
| 51      | Ibuprofen           | mg        | 0      | 0      | NEED   | 0             | 0                    | 0 NSAID                       |
| 52      | Ramipril            | mg        | 5      | 5      | 5      | 1             | 1                    | 1 ACE_INHIBITOR               |
| 52      | Metoprolol          | mg        | 107.5  | 107.5  | 107.5  | 1             | 1                    | 1 BETA_BLOCKER                |
| 52      | Iodine              | microgram | 150    | 150    | 150    | 1             | 1                    | 1 IODINE                      |
| 52      | L-Thyroxine         | microgram | 50     | 50     | 50     | 1             | 1                    | 1 THYROID                     |
| 53      | Valsartan           | mg        | 80     | 80     | 80     | 1             | 1                    | 1 AT2_BLOCKER                 |
| 53      | Hydrochlorothiazide | mg        | 6.25   | 6.25   | 6.25   | 1             | 1                    | 1 DIURETIC                    |
| 54      | Ramipril            | mg        | 5      | 5      | 5      | 1             | 1                    | 1 ACE_INHIBITOR               |
| 54      | Amitriptyline       | mg        | 10     | 10     | 10     | 1             | 1                    | 1 ANTIDEPRESSANT              |
| 54      | Bupropion           | mg        | 150    | 150    | 150    | 1             | 1                    | 1 ANTIDEPRESSANT              |
| 54      | Salbutamol          | microgram | NEED   | NEED   | NEED   | 0             | 0                    | 0 BETA_2_AGONIST              |
| 54      | Tramadol            | mg        | 200    | 200    | 200    | 1             | 1                    | 1 OPIATE                      |
| 55      | Losartan            | mg        | 100    | 160    | 160    | 1             | 1.6                  | 1.6 AT2_BLOCKER               |
| 55      | Metformin           | mg        | 1000   | 2000   | 2000   | 1             | 2                    | 2 METFORMIN                   |
| 55      | Simvastatin         | mg        | 20     | 10     | 10     | 1             | 0.5                  | 0.5 STATIN                    |
| 55      | L-Thyroxine         | microgram | 50     | 50     | 50     | 1             | 1                    | 1 THYROID                     |
| 55      | Allopurinol         | mg        | 300    | 150    | 150    | 1             | 0.5                  | 0.5 XANTHAN_OXIDASE_INHIBITOR |
| 56      | Sitagliptin         | mg        | 100    | 100    | 100    | 1             | 1                    | 1 ANTIDIABETIC                |
| 56      | Candesartan         | mg        | 32     | 32     | 32     | 1             | 1                    | 1 AT2_BLOCKER                 |
| 56      | Nitrendipine        | mg        | 40     | 40     | 40     | 1             | 1                    | 1 CALCIUMANTAGONIST           |
| 56      | Hydrochlorothiazide | mg        | 25     | 25     | 25     | 1             | 1                    | 1 DIURETIC                    |
| 56      | Moxonidine          | mg        | 0.4    | 0.4    | 0.4    | 1             | 1                    | 1 IMIDAZOLE_AGONIST           |
| 56      | Metformin           | mg        | 2000   | 2000   | 2000   | 1             | 1                    | 1 METFORMIN                   |
| 56      | Spironolactone      | mg        | 25     | 25     | 25     | 1             | 1                    | 1 DIURETIC                    |
| 56      | Simvastatin         | mg        | 60     | 60     | 60     | 1             | 1                    | 1 STATIN                      |
| 56      | L-Thyroxine         | microgram | 100    | 100    | 100    | 1             | 1                    | 1 THYROID                     |
| 57      | Irbesartan          | mg        | 150    | 150    | 150    | 1             | 1                    | 1 AT2_BLOCKER                 |
| 57      | Bisoprolol          | mg        | 1      | 1      | 1      | 1             | 1                    | 1 BETA_BLOCKER                |
| 57      | Hydrochlorothiazide | mg        | 12.5   | 12.5   | 12.5   | 1             | 1                    | 1 DIURETIC                    |
| 57      | Metformin           | mg        | 1000   | 1000   | 1000   | 1             | 1                    | 1 METFORMIN                   |
| 57      | Tyrosine            | NA        | 0      | 0      | 0      | 0             | 0                    | 0 THYROID                     |
| 57      | Vit D3              | IU        | 1000   | 1000   | 1000   | 1             | 1                    | 1 VITAMIN_D                   |
| 58      | Tamsulosin          | mg        | 0.4    | 0.4    | 0.4    | 1             | 1                    | 1 ALPHA_I_BLOCKER_BPH         |
| 58      | Dutasteride         | mg        | 0.5    | 0.5    | 0.5    | 1             | 1                    | 1 DHT_INHIBITOR               |
| 58      | Iodine              | microgram | 50     | 50     | 50     | 1             | 1                    | 1 IODINE                      |
| 59      | Nitroglycerine      | NA        | 1      | 1      | 1      | 1             | 1                    | 1 VASODILATOR                 |
| 59      | Valsartan           | mg        | 320    | 320    | 320    | 1             | 1                    | 1 AT2_BLOCKER                 |
| 59      | Metoprolol          | mg        | 200    | 200    | 200    | 1             | 1                    | 1 BETA_BLOCKER                |
| 59      | Lercanidipine       | mg        | 20     | 0      | 10     | 1             | 0.5                  | 0.5 CALCIUMANTAGONIST         |
| 59      | Furosemide          | mg        | 5      | 5      | 5      | 1             | 1                    | 1 DIURETIC                    |
| 59      | Hydrochlorothiazide | mg        | 25     | 25     | 25     | 1             | 1                    | 1 DIURETIC                    |
| 59      | Moxonidine          | mg        | 0.4    | 0.4    | 0.4    | 1             | 1                    | 1 IMIDAZOLE_AGONIST           |
| 59      | Spironolactone      | mg        | 25     | 0      | 25     | 1             | 1                    | 1 DIURETIC                    |
| 60      | Aspirin             | mg        | 100    | 100    | 100    | 1             | 1                    | 1 ANTI_PLATELET               |

Table S2 drug data

| Subject | Drug                | Unit      | DoseV1 | DoseV2 | DoseV3 | V1_normalized | V3_in_relation to_V1 | Drug class                |
|---------|---------------------|-----------|--------|--------|--------|---------------|----------------------|---------------------------|
| 60      | Metoprolol          | mg        | 23.75  | 23.75  | 23.75  | 1             | 1                    | BETA_BLOCKER              |
| 60      | Amlodipine          | mg        | 5      | 2.5    | 2.5    | 1             | 0.5                  | CALCIUMANTAGONIST         |
| 60      | Furosemide          | mg        | 10     | 10     | 0      | 1             | 0                    | DIURETIC                  |
| 60      | L-Thyroxine         | microgram | 75     | 75     | 75     | 1             | 1                    | THYROID                   |
| 61      | Ramipril            | mg        | 5      | 5      | 0      | 1             | 0                    | ACE_INHIBITOR             |
| 61      | Folic acid          | NA        | SOME   | 0      | 0      | 0             | 0                    | FOLIC_ACID                |
| 61      | Vit D3              | IU        | 1000   | 1000   | 0      | 1             | 0                    | VITAMIN_D                 |
| 62      | Losartane           | mg        | 50     | 25     | 0      | 1             | 0                    | AT2_BLOCKER               |
| 62      | Desogestrel         | microgram | 75     | 0      | 0      | 1             | 0                    | PROGESTERON               |
| 63      | Dapagliflozin       | mg        | 0      | 10     | 10     | 0             | 1                    | ANTIDIABETIC              |
| 63      | Sitagliptin         | mg        | 100    | 100    | 100    | 1             | 1                    | ANTIDIABETIC              |
| 63      | Candesartan         | mg        | 8      | 8      | 32     | 1             | 4                    | AT2_BLOCKER               |
| 63      | Bisoprolol          | mg        | 5      | 5      | 0      | 1             | 0                    | BETA_BLOCKER              |
| 63      | Metformin           | mg        | 500    | 500    | 500    | 1             | 1                    | METFORMIN                 |
| 63      | Tolterodine         | mg        | 1      | 1      | 1      | 1             | 1                    | OTHER_PARASYMPATHOLYTICS  |
| 63      | Atorvastatin        | mg        | 20     | 20     | 20     | 1             | 1                    | STATIN                    |
| 63      | Allopurinol         | mg        | 0      | 150    | 150    | 0             | 1                    | XANTHAN_OXIDASE_INHIBITOR |
| 64      | Valsartan           | mg        | 640    | 640    | 320    | 1             | 0.5                  | AT2_BLOCKER               |
| 64      | Atenolol            | mg        | 100    | 100    | 50     | 1             | 0.5                  | BETA_BLOCKER              |
| 64      | Diclofenac          | mg        | NEED   | NEED   | NEED   | 0             | 0                    | NSAID                     |
| 64      | Pantoprazole        | mg        | 0      | 0      | 40     | 0             | 1                    | PPI                       |
| 64      | L-Thyroxine         | microgram | 87.5   | 87.5   | 88     | 1             | 1.005714286          | THYROID                   |
| 65      | Ramipril            | mg        | 1.25   | 1.25   | 1.25   | 1             | 1                    | ACE_INHIBITOR             |
| 65      | Pregabalin          | mg        | 75     | 75     | 70     | 1             | 0.933333333          | ANTICONVULSIVE            |
| 65      | Aromataseinhibitor  | NA        | NA     | NA     | NA     | 0             | 0                    | DHT_INHIBITOR             |
| 66      | Ramipril            | mg        | 10     | 10     | 10     | 1             | 1                    | ACE_INHIBITOR             |
| 66      | Metoprolol          | mg        | 23.75  | 23.75  | 23.75  | 1             | 1                    | BETA_BLOCKER              |
| 66      | Hydrochlorothiazide | mg        | 25     | 25     | 25     | 1             | 1                    | DIURETIC                  |
| 66      | L-Thyroxine         | microgram | 50     | 50     | NA     | 1             | 1                    | THYROID                   |
| 67      | NONE                | NA        | NONE   | NONE   | NONE   | 0             | 0                    | NONE                      |
| 68      | Candesartan         | mg        | 0      | 0      | 80     | 0             | 1                    | AT2_BLOCKER               |
| 68      | Valsartan           | mg        | 160    | 160    | 0      | 1             | 0                    | AT2_BLOCKER               |
| 68      | Diclofenac          | mg        | 75     | 0      | 150    | 1             | 2                    | NSAID                     |
| 68      | L-Thyroxine         | microgram | 25     | 25     | 50     | 1             | 2                    | THYROID                   |
| 68      | Vit D3              | IU        | 1000   | 1000   | 0      | 1             | 0                    | VITAMIN_D                 |
| 69      | Timolol eye drops   | NA        | NA     | NA     | NA     | 0             | 0                    | EYE_BETA_BLOCKER          |
| 69      | NO_aHT              | NA        | NO_aHT | NO_aHT | NO_aHT | 0             | 0                    | NO_aHT                    |
| 70      | Sitagliptin         | mg        | 100    | 100    | 100    | 1             | 1                    | ANTIDIABETIC              |
| 70      | Irbesartan          | mg        | 300    | 300    | 300    | 1             | 1                    | AT2_BLOCKER               |
| 70      | Metformin           | mg        | 1700   | 1700   | 1700   | 1             | 1                    | METFORMIN                 |
| 72      | Candesartan         | mg        | 32     | 0      | 0      | 1             | 0                    | AT2_BLOCKER               |
| 72      | Bisoprolol          | mg        | 10     | 0      | 10     | 1             | 1                    | BETA_BLOCKER              |
| 72      | Amlodipine          | mg        | 10     | 0      | 2.5    | 1             | 0.25                 | CALCIUMANTAGONIST         |
| 73      | Ibuprofen           | mg        | 1800   | 1800   | 0      | 1             | 0                    | NSAID                     |
| 73      | Valsartan           | mg        | 320    | 320    | 320    | 1             | 1                    | AT2_BLOCKER               |
| 73      | Amlodipine          | mg        | 10     | 10     | 10     | 1             | 1                    | CALCIUMANTAGONIST         |
| 73      | Hydrochlorothiazide | mg        | 25     | 25     | 25     | 1             | 1                    | DIURETIC                  |
| 73      | Torsemide           | mg        | 10     | 10     | 10     | 1             | 1                    | DIURETIC                  |
| 73      | Tramadol            | mg        | 100    | 100    | 0      | 1             | 0                    | OPIATE                    |
| 73      | Pantoprazole        | mg        | 40     | 40     | 0      | 1             | 0                    | PPI                       |
| 73      | Simvastatin         | mg        | 40     | 40     | 40     | 1             | 1                    | STATIN                    |
| 74      | Losartan            | mg        | 100    | 100    | 100    | 1             | 1                    | AT2_BLOCKER               |
| 74      | Hydrochlorothiazide | mg        | 25     | 0      | 25     | 1             | 1                    | DIURETIC                  |

Table S2 BP data

| PatientID | Group | Group name     | Age | Sex | Height | SBP_ABPM_24h | SBP_ABPM_24h_V |
|-----------|-------|----------------|-----|-----|--------|--------------|----------------|
| 1         | 1     | 1 fasting+DASH | 63  | 0   | 168    | 122          | 120            |
| 2         | 1     | 1 fasting+DASH | 60  | 1   | 178    | 141          | 119            |
| 3         | 1     | 1 fasting+DASH | 53  | 1   | 184    | 133          | 134            |
| 4         | 2     | 2 DASH         | 68  | 0   | 185    | 125          | 119            |
| 5         | 2     | 2 DASH         | 56  | 0   | 166    | 130          | 128            |
| 7         | 2     | 2 DASH         | 65  | 0   | 165    | 120          | 118            |
| 8         | 2     | 2 DASH         | 58  | 1   | 172    | 128          | 126            |
| 9         | 2     | 2 DASH         | 70  | 1   | 176    | 127          | 120            |
| 11        | 2     | 2 DASH         | 64  | 1   | 184    | 145          | 139            |
| 12        | 1     | 1 fasting+DASH | 65  | 1   | 186    | 136          | 136            |
| 13        | 1     | 1 fasting+DASH | 57  | 0   | 168    | 141          | 133            |
| 14        | 2     | 2 DASH         | 63  | 0   | 165    | 140          | 134            |
| 15        | 2     | 2 DASH         | 58  | 1   | 182    | 121          | 124            |
| 16        | 1     | 1 fasting+DASH | 51  | 0   | 170    | 116          | 117            |
| 17        | 1     | 1 fasting+DASH | 57  | 0   | 159    | 128          | 127            |
| 18        | 2     | 2 DASH         | 59  | 0   | 164    | 141          | 135            |
| 19        | 2     | 2 DASH         | 67  | 0   | 160    | 148          | 131            |
| 20        | 2     | 2 DASH         | 64  | 0   | 158    | 130          | 127            |
| 21        | 1     | 1 fasting+DASH | 53  | 0   | 176    | 129          | 127            |
| 22        | 1     | 1 fasting+DASH | 72  | 1   | 172    | 139          | 139            |
| 23        | 2     | 2 DASH         | 48  | 1   | 176    | 128          | 142            |
| 24        | 1     | 1 fasting+DASH | 50  | 0   | 162    | 121          | 126            |
| 25        | 2     | 2 DASH         | 47  | 0   | 172    | 132          | 119            |
| 26        | 1     | 1 fasting+DASH | 61  | 0   | 170    | 123          | 135            |
| 27        | 2     | 2 DASH         | 53  | 1   | 181    | 126          | 129            |
| 28        | 1     | 1 fasting+DASH | 57  | 0   | 172    | 146          | 131            |
| 29        | 2     | 2 DASH         | 51  | 0   | 165    | 123          | 127            |
| 30        | 1     | 1 fasting+DASH | 61  | 0   | 160    | 144          | 131            |
| 31        | 2     | 2 DASH         | 74  | 0   | 157    | 131          | 165            |
| 32        | 2     | 2 DASH         | 70  | 1   | 170    | 131          | 122            |
| 33        | 1     | 1 fasting+DASH | 51  | 1   | 174    | 129          | 122            |
| 34        | 1     | 1 fasting+DASH | 50  | 0   | 169    | 130          | 137            |
| 35        | 1     | 1 fasting+DASH | 47  | 0   | 168    | 141          | 126            |
| 36        | 2     | 2 DASH         | 65  | 1   | 180    | 119          | 119            |
| 37        | 1     | 1 fasting+DASH | 53  | 0   | 164    | 122          | 110            |
| 38        | 2     | 2 DASH         | 67  | 1   | 176    | 130          | 129            |
| 39        | 1     | 1 fasting+DASH | 60  | 0   | 159    | 140          | 152            |
| 40        | 2     | 2 DASH         | 64  | 0   | 167    | 123          | 114            |
| 41        | 2     | 2 DASH         | 73  | 0   | 170    | 117          | 107            |
| 42        | 2     | 2 DASH         | 60  | 0   | 167    | 146          | 119            |
| 43        | 1     | 1 fasting+DASH | 70  | 0   | 170    | 144          | 136            |
| 44        | 2     | 2 DASH         | 49  | 1   | 174    | 138          | 150            |
| 45        | 1     | 1 fasting+DASH | 62  | 0   | 174    | 118          | 115            |
| 46        | 1     | 1 fasting+DASH | 44  | 0   | 172    | 119          | 125            |
| 47        | 1     | 1 fasting+DASH | 70  | 1   | 182    | 129          | 115            |
| 48        | 2     | 2 DASH         | 64  | 0   | 167    | 123          | 131            |
| 49        | 1     | 1 fasting+DASH | 52  | 0   | 160    | 123          | 119            |
| 50        | 1     | 1 fasting+DASH | 60  | 1   | 185    | 142          | 129            |
| 51        | 2     | 2 DASH         | 55  | 0   | 172    | 156          | 140            |
| 52        | 1     | 1 fasting+DASH | 57  | 0   | 168    | 128          | 113            |
| 53        | 2     | 2 DASH         | 70  | 0   | 172    | 135          | 148            |
| 54        | 2     | 2 DASH         | 49  | 0   | 160    | 130          | 128            |
| 55        | 1     | 1 fasting+DASH | 54  | 1   | 178    | 120          | 118            |
| 56        | 2     | 2 DASH         | 73  | 0   | 163    | 132          | 127            |
| 57        | 2     | 2 DASH         | 54  | 1   | 180    | 134          | 140            |

Table S2 BP data

| PatientID | Group | Group name   | Age | Sex | Height | SBP_ABPM_24h | SBP_ABPM_24h_V |
|-----------|-------|--------------|-----|-----|--------|--------------|----------------|
| 58        | 1     | fasting+DASH | 62  | 1   | 175    | 139          | 133            |
| 59        | 1     | fasting+DASH | 64  | 1   | 172    | 138          | 145            |
| 60        | 2     | DASH         | 65  | 1   | 180    | 139          | 139            |
| 61        | 1     | fasting+DASH | 46  | 1   | 178    | 129          | 133            |
| 62        | 1     | fasting+DASH | 50  | 0   | 174    | 131          | 128            |
| 63        | 2     | DASH         | 72  | 1   | 173    | 136          | 138            |
| 64        | 1     | fasting+DASH | 66  | 0   | 168    | 138          | 117            |
| 65        | 1     | fasting+DASH | 75  | 0   | 157    | 130          | 130            |
| 66        | 2     | DASH         | 56  | 0   | 165    | 121          | 104            |
| 67        | 1     | fasting+DASH | 47  | 1   | 188    | 150          | 144            |
| 68        | 1     | fasting+DASH | 69  | 0   | 157    | 138          | 130            |
| 69        | 2     | DASH         | 65  | 0   | 154    | 135          | 125            |
| 70        | 2     | DASH         | 63  | 1   | 178    | 133          | 125            |
| 72        | 2     | DASH         | 63  | 0   | 160    | 123          | 133            |
| 73        | 2     | DASH         | 64  | 1   | 186    | 118          | 114            |
| 74        | 1     | fasting+DASH | 52  | 0   | 170    | 125          | 127            |
